# Supplementary material for: Comparative Genomic Analysis Uncovered Evolution of Pathogenicity Factors, Horizontal Gene Transfer Events, and Heavy Metal Resistance Traits in Citrus Canker Bacterium Xanthomonas citri subsp. citri
Source: Front Microbiol. 2021 Sep 7;12:731711. doi: 10.3389/fmicb.2021.731711 (PMC8453159; doi:10.3389/fmicb.2021.731711)
Supplement: Supplementary Table 1 — Summary of assembly and annotation statistics. [file Data_Sheet_1.xlsx]

## Sheet: Table S1
Supplementary Table 1. Summary of assembly and annotation statistics.
Strain	Size	GC (%)	Genes	RNA	Depth		Accession number
					Illumina	Nanopore
B2	5120747	64.84	4489	106	236	305	CP059999
pB2_V1	137420	61	170	1(tRNA-ILE)	302	756	CP060000
pB2_V3	94653	60.86	112	1(tRNA-ILE)	416	1064	CP060001
SN3-3	5192310	64.77	4539	106	229	270	CP060002
pSN3-3	63921	61.32	78	0	415	923	CP060003
T4	5194482	64.76	4557	106	212	213	CP059992
pT4p1	99130	61.61	124	0	366	808	CP059993
pT4p2	312426	59.76	294	0	263	335	CP059994

## Sheet: Table S2
Supplementary Table 2. Strains used for pan-genome analysis.
Organism name	Accession number	Location	CDS	Reference
X. albilineans GPE PC73	NC_013722.1	France	3204	Pieretti, I., et al. (2009)
X. albilineans Xa-FJ1	NZ_CP046570.1	China: Fujian	2968	Zhang H. L., et al. (2020)
X. citri subsp. aurantifolii FDC1559	NZ_CP011160.1	Brazil	4222	Fonseca, N. P., et al. (2019)
X. citri subsp. aurantifolii FDC1561	NZ_CP011250.1	Argentina	4014	Fonseca, N. P., et al. (2019)
X. citri subsp. aurantifolii FDC1566	NZ_CP012002.1	Argentina	3941	Fonseca, N. P., et al. (2019)
X. citri subsp. aurantifolii FDC1609	NZ_CP011163.1	Brazil	4227	Fonseca, N. P., et al. (2019)
X. citri subsp. citri 031638-1-1*	NZ_CP023285.1	Argentina	4475	Gochez, A. M., et al. (2018)
X. citri subsp. citri 306*	NC_003919.1	Brazil	4276	da Silva, A., et al. (2002)
X. citri subsp. citri 5028*	NZ_CP009028.1	USA: Florida	4252	Zhang Y., et al. (2015)
X. citri subsp. citri AW13*	NZ_CP009031.1	USA: Florida	4369	Zhang Y., et al. (2015)
X. citri subsp. citri AW14*	NZ_CP009034.1	USA: Florida	4347	Zhang Y., et al. (2015)
X. citri subsp. citri AW15*	NZ_CP009037.1	USA: Florida	4353	Zhang Y., et al. (2015)
X. citri subsp. citri AW16*	NZ_CP009040.1	USA: Florida	4351	Zhang Y., et al. (2015)
X. citri subsp. citri B2*	CP059999	Taiwan: Taichung	4589	This study
X. citri subsp. citri BL18*	NZ_CP009025.1	USA: Florida	4249	Zhang Y., et al. (2015)
X. citri subsp. citri FB19*	NZ_CP009022.1	USA: Florida	4250	Zhang Y., et al. (2015)
X. citri subsp. citri GD2*	NZ_CP009019.1	China: Guangdong	4230	Zhang Y., et al. (2015)
X. citri subsp. citri GD3*	NZ_CP009016.1	China: Guangdong	4219	Zhang Y., et al. (2015)
X. citri subsp. citri JX4*	NZ_CP009013.1	China: Jiangxi	4225	Zhang Y., et al. (2015)
X. citri subsp. citri JX5*	NZ_CP009010.1	China: Jiangxi	4225	Zhang Y., et al. (2015)
X. citri subsp. citri jx-6*	NZ_CP011827.2	China: Jiangxi	4243	NA
X. citri subsp. citri LH201*	NZ_CP018858.1	Reunion	4448	Richard, D., et al. (2017)
X. citri subsp. citri LH276*	NZ_CP018854.1	Reunion	4491	Richard, D., et al. (2017)
X. citri subsp. citri LJ207-7*	NZ_CP018850.1	Reunion	4507	Richard, D., et al. (2017)
X. citri subsp. citri LL704-4*	NZ_CP018847.1	Martinique	4474	Richard, D., et al. (2017)
X. citri subsp. citri LM180*	NZ_CM007622.1	Argentina	4591	Richard, D., et al. (2017)
X. citri subsp. citri LM199*	NZ_CM007619.1	Argentina	4492	Richard, D., et al. (2017)
X. citri subsp. citri MF20*	NZ_CP009007.1	USA: Florida	4250	Zhang Y., et al. (2015)
X. citri subsp. citri MN10*	NZ_CP009004.1	USA: Florida	4211	Zhang Y., et al. (2015)
X. citri subsp. citri MN11*	NZ_CP009001.1	USA: Florida	4244	Zhang Y., et al. (2015)
X. citri subsp. citri MN12*	NZ_CP008998.1	USA: Florida	4227	Zhang Y., et al. (2015)
X. citri subsp. citri NT17*	NZ_CP008995.1	USA: Florida	4251	Zhang Y., et al. (2015)
X. citri subsp. citri SN3-3*	CP060002	Taiwan: Chiayi	4639	This study
X. citri subsp. citri T4*	CP059992	Taiwan: Taichung	4657	This study
X. citri subsp. citri TX160042*	NZ_CP020882.1	USA: Texas	4508	Bodnar A. M., et al. (2017)
X. citri subsp. citri TX160149*	NZ_CP020885.1	USA: Texas	4568	Bodnar A. M., et al. (2017)
X. citri subsp. citri TX160197*	NZ_CP020889.1	USA: Texas	4680	Bodnar A. M., et al. (2017)
X. citri subsp. citri UI6*	NZ_CP008992.1	China: Guangxi	4213	Zhang Y., et al. (2015)
X. citri subsp. citri UI7*	NZ_CP008989.1	China: Guangxi	4232	Zhang Y., et al. (2015)
X. citri subsp. citri Xcc-29-1*	NZ_CP023661.1	China: Jiangxi	4307	NA
X. citri subsp. citri Xcc49*	NZ_CP023662.1	China: Chongqing	4244	NA
X. citri subsp. fuscans 4834-R	NC_022541.1	France	3987	Darrasse, A., et al. (2013)
X. citri subsp. fuscans ISO118C1	NZ_CP012053.1	Canada: Ontario	4253	NA
X. citri subsp. fuscans ISO118C5	NZ_CP012051.1	Canada: Ontario	4252	NA
X. citri subsp. fuscans ISO12C3	NZ_CP012055.1	Canada: Ontario	4248	NA
X. citri subsp. glycines 1018	NZ_CP041961.1	South Korea: Hwaseong	4144	NA
X. citri subsp. glycines 1157	NZ_CP041963.1	South Korea: Pocheon	4308	NA
X. citri subsp. glycines 12-2	NZ_CP015972.1	Thailand	4429	Carpenter,S.C.D., et al. (2019)
X. citri subsp. glycines 2098	NZ_CP041965.1	South Korea: Suwon	4105	NA
X. citri subsp. glycines 8ra	NZ_CP017188.2	USA: Iowa	4377	Carpenter,S.C.D., et al. (2019)
X. citri subsp. glycines 8ra	NZ_CP041781.1	South Korea: Suwon	4401	Carpenter,S.C.D., et al. (2019)
X. citri subsp. glycines EB08	NZ_CP026334.1	USA: Iowa	4348	Carpenter,S.C.D., et al. (2019)
X. citri subsp. glycines K2	NZ_CP041967.1	South Korea: Danyang	4300	NA
X. citri subsp. malvacearum AR81009	NZ_CP023155.1	Argentina	4268	NA
X. citri subsp. malvacearum HD-1	NZ_CP046019.1	China	4227	NA
X. citri subsp. malvacearum MS14003	NZ_CP023159.1	USA: Mississippi	4051	NA
X. citri subsp. malvacearum MSCT	NZ_CP017020.1	USA: Mississippi	4015	Showmaker, K.C., et al. (2017)
X. citri subsp. malvacearum XcmH1005	NZ_CP013004.1	USA: Oklahoma	4133	NA
X. citri subsp. malvacearum XcmN1003	NZ_CP013006.1	Burkina Faso	4130	NA
X. citri subsp. phaseoli var. fuscans CFBP4885	NZ_CP020992.1	France	4054	Ruh, M., et al. (2017)
X. citri subsp. phaseoli var. fuscans CFBP6165	NZ_CP020998.1	Canada	3993	Ruh, M., et al. (2017)
X. citri subsp. phaseoli var. fuscans CFBP6166	NZ_CP021001.1	South Africa	4118	Ruh, M., et al. (2017)
X. citri subsp. phaseoli var. fuscans CFBP6167	NZ_CP021018.1	USA	4281	Ruh, M., et al. (2017)
X. citri subsp. phaseoli var. fuscans CFBP6975	NZ_CP021006.1	France	4155	Ruh, M., et al. (2017)
X. citri subsp. phaseoli var. fuscans CFBP6988R	NZ_CP020979.1	Reunion	4202	Ruh, M., et al. (2017)
X. citri subsp. phaseoli var. fuscans CFBP6989	NZ_CP020981.1	Reunion	4202	Ruh, M., et al. (2017)
X. citri subsp. phaseoli var. fuscans CFBP6990	NZ_CP020983.1	Reunion	4219	Ruh, M., et al. (2017)
X. citri subsp. phaseoli var. fuscans CFBP6991	NZ_CP021015.1	Reunion	4336	Ruh, M., et al. (2017)
X. citri subsp. phaseoli var. fuscans CFBP6992	NZ_CP020985.1	Reunion	4203	Ruh, M., et al. (2017)
X. citri subsp. phaseoli var. fuscans CFBP6994R	NZ_CP020987.1	Tanzania	4108	Ruh, M., et al. (2017)
X. citri subsp. phaseoli var. fuscans CFBP6996R	NZ_CP020989.1	Reunion	4057	Ruh, M., et al. (2017)
X. citri subsp. punicae BD0023	NZ_CP030161.1	India	3972	NA
X. citri subsp. punicae BD0025	NZ_CP030169.1	India	3976	NA
X. citri subsp. punicae LMG7439	NZ_CP030164.1	India	4066	NA
X. citri subsp. vignicola CFBP7111	NZ_CP022263.1	USA: Texas	4689	Ruh, M., et al. (2017)
X. citri subsp. vignicola CFBP7112	NZ_CP022267.1	NA	4457	Ruh, M., et al. (2017)
X. citri subsp. vignicola CFBP7113	NZ_CP022270.1	Sudan	4002	Ruh, M., et al. (2017)
X. citri subsp. citri A306	NZ_CP006857.1	NA	4270	NA
X. citri subsp. citri AW12879*	NC_020815.1	USA: Florida	4365	Jalan, N., et al. (2013)
X. oryzae NJ611	NZ_CP036252.1	Mali	3805	Lang, J. M., et al. (2019)
X. oryzae X11-5A	NZ_CP036251.1	USA: Texas	3702	Triplett, L. R., et al. (2011)
* strains used for ParSNP analysis
Pieretti, I., et al. (2009). "The complete genome sequence of Xanthomonas albilineans provides new insights into the reductive genome evolution of the xylem-limited Xanthomonadaceae." BMC genomics 10: 616.
Zhang, H. L., et al. (2020). "Complete Genome Sequence Reveals Evolutionary and Comparative Genomic Features of Xanthomonas albilineans Causing Sugarcane Leaf Scald." Microorganisms 8(2).
Fonseca, N. P., et al. (2019). "Analyses of Seven New Genomes of Xanthomonas citri pv. aurantifolii Strains, Causative Agents of Citrus Canker B and C, Show a Reduced Repertoire of Pathogenicity-Related Genes." Front Microbiol 10: 2361.
Gochez, A. M., et al. (2018). "Pacbio sequencing of copper-tolerant Xanthomonas citri reveals presence of a chimeric plasmid structure and provides insights into reassortment and shuffling of transcription activator-like effectors among X. citri strains." BMC genomics 19(1): 16.
da Silva, A. C., et al. (2002). "Comparison of the genomes of two Xanthomonas pathogens with differing host specificities." Nature 417(6887): 459-463.
Zhang, Y., et al. (2015). "Positive selection is the main driving force for evolution of citrus canker-causing Xanthomonas." ISME J 9(10): 2128-2138.
Richard, D., et al. (2017). "Adaptation of genetically monomorphic bacteria: evolution of copper resistance through multiple horizontal gene transfers of complex and versatile mobile genetic elements." Mol Ecol 26(7): 2131-2149.
Bodnar, A. M., et al. (2017). "Complete genome sequences of three Xanthomonas citri strains from Texas." Genome announcements 5(28).
Darrasse, A., et al. (2013). "Genome sequence of Xanthomonas fuscans subsp. fuscans strain 4834-R reveals that flagellar motility is not a general feature of xanthomonads." BMC genomics 14(1): 1-30.
Carpenter, S. C., et al. (2019). "Complete genome sequences of Xanthomonas axonopodis pv. glycines isolates from the United States and Thailand reveal conserved transcription activator-like effectors." Genome biology and evolution 11(5): 1380-1384.
Showmaker, K. C., et al. (2017). "The genome of the cotton bacterial blight pathogen Xanthomonas citri pv. malvacearum strain MSCT1." Standards in genomic sciences 12(1): 1-12.
Ruh, M., et al. (2017). "Xanthomonas adaptation to common bean is associated with horizontal transfers of genes encoding TAL effectors." BMC genomics 18(1): 670.
Ruh, M., et al. (2017). "First complete genome sequences of Xanthomonas citri pv. vignicola strains CFBP7111, CFBP7112, and CFBP7113 obtained using long-read technology." Genome announcements 5(36).
Jalan, N., et al. (2013). "Complete genome sequence of Xanthomonas citri subsp. citri strain Aw12879, a restricted-host-range citrus canker-causing bacterium." Genome announcements 1(3).
Lang, J. M., et al. (2019). "A pathovar of Xanthomonas oryzae infecting wild grasses provides insight into the evolution of pathogenicity in rice agroecosystems." Frontiers in plant science 10: 507.
Triplett, L. R., et al. (2011). "Genomic analysis of Xanthomonas oryzae isolates from rice grown in the United States reveals substantial divergence from known X. oryzae pathovars." Appl Environ Microbiol 77(12): 3930-3937.

## Sheet: Table S3
Supplementary Table 3. Pairwise nucleotide sequences identified by fastANI
		NC_013722.1	NZ_CP046570.1	NZ_CP036251.1	NZ_CP036252.1	NZ_CP012055.1	NZ_CP012051.1	NZ_CP012053.1	NC_022541.1	NZ_CP011163.1	NZ_CP011160.1	NZ_CP012002.1	NZ_CP011250.1	NZ_CP022267.1	NZ_CP022263.1	NZ_CP022270.1	NZ_CP021006.1	NZ_CP021018.1	NZ_CP020992.1	NZ_CP021001.1	NZ_CP020998.1	NZ_CP020985.1	NZ_CP020987.1	NZ_CP020989.1	NZ_CP020981.1	NZ_CP020979.1	NZ_CP021015.1	NZ_CP020983.1	NZ_CP046019.1	NZ_CP013006.1	NZ_CP013004.1	NZ_CP023155.1	NZ_CP017020.1	NZ_CP023159.1	NZ_CP030164.1	NZ_CP030169.1	NZ_CP030161.1	NZ_CP041965.1	NZ_CP015972.1	NZ_CP017188.2	NZ_CP041781.1	NZ_CP026334.1	NZ_CP041967.1	NZ_CP041963.1	NZ_CP041961.1	NZ_CP009037.1	NZ_CP009034.1	NZ_CP009031.1	NC_020815.1
X. albilineans GPE PC73	NC_013722.1	100	99.975	79.8583	79.9033	79.8968	79.8111	79.7819	79.9788	79.7278	79.9138	79.8318	79.9515	79.7238	79.8123	79.9564	79.7573	79.8368	79.822	79.734	79.8258	79.9283	80.0039	79.977	79.8591	79.8683	79.9042	79.9132	79.9374	79.9458	79.9541	79.835	79.9095	79.8912	79.8263	80.0035	79.9776	80.3223	79.8244	80.0159	79.9707	80.0512	79.8497	79.934	79.8877	79.8992	79.8729	79.854	79.9806
X. albilineans Xa-FJ1	NZ_CP046570.1	99.9855	100	79.8773	79.8643	79.9008	79.8136	79.803	79.9239	79.7844	79.8483	79.8602	79.9825	79.7448	79.8157	79.9601	79.7798	79.8012	79.8746	79.7143	79.7742	79.8336	80.0354	79.9448	79.8844	79.925	79.9171	79.9541	79.9031	79.9006	79.9036	79.8152	79.944	79.8856	79.8775	79.9663	80.0301	80.3793	79.8574	80.0086	79.9863	80.0699	79.8129	79.9581	79.9202	79.8741	79.879	79.8557	79.8629
X. oryzae X11-5A	NZ_CP036251.1	79.661	79.7944	100	96.9787	89.9542	89.9023	89.8903	89.9225	89.9352	89.8965	89.9806	90.0524	89.9565	89.7937	89.9526	89.9039	89.9625	89.915	89.8765	89.8472	89.9539	89.917	89.8897	89.9592	89.8791	89.9099	89.9828	89.8144	89.7794	89.8101	89.815	89.8356	89.8186	89.7802	89.8247	89.8819	86.862	89.9124	89.9009	89.9407	89.9252	89.8673	89.9166	89.9279	89.9622	89.9766	89.9773	89.9505
X. oryzae NJ611	NZ_CP036252.1	79.8082	79.8978	96.9645	100	90.0856	90.0747	90.0705	90.1416	89.9588	90.0523	90.0907	90.1316	90.1693	90.1431	90.1864	90.0914	90.0479	90.0992	90.1015	90.1272	90.1873	90.0355	90.1036	90.1462	90.0781	90.1259	90.1461	90.0076	90.1113	89.969	89.9783	90.0217	89.993	90.2514	90.1415	90.2173	87.0513	90.006	90.153	90.1698	90.1302	90.0778	90.0358	90.1908	90.0878	90.1048	90.1066	90.1232
X. citri subsp. fuscans ISO12C3	NZ_CP012055.1	79.9773	79.8979	89.9098	90.1187	100	99.9919	99.992	99.7817	98.5655	98.5428	98.6278	98.5665	98.4999	98.5218	98.5045	99.7897	99.9632	99.7821	99.786	99.7825	98.6311	98.6197	98.6824	98.7841	98.7088	98.7421	98.7818	96.0625	96.0661	96.048	96.0375	96.0624	96.0407	96.0549	96.0786	96.0496	87.5301	96.1589	96.2763	96.2753	96.1889	96.1824	96.232	96.2574	96.1765	96.1698	96.1707	96.1496
X. citri subsp. fuscans ISO118C5	NZ_CP012051.1	80.0322	79.9806	89.9363	90.0961	99.9932	100	99.9999	99.7944	98.5908	98.5201	98.6143	98.5753	98.5148	98.5044	98.5192	99.8016	99.9728	99.794	99.7902	99.7742	98.6334	98.6164	98.6504	98.7788	98.7402	98.7413	98.7964	96.0523	96.0688	96.0757	96.0435	96.0688	96.0609	96.0639	96.0675	96.0649	87.5475	96.1513	96.274	96.2701	96.2232	96.1707	96.2292	96.2321	96.1722	96.1641	96.1647	96.1318
X. citri subsp. fuscans ISO118C1	NZ_CP012053.1	80.0234	79.9806	89.9389	90.0953	99.9933	99.9999	100	99.795	98.5907	98.5201	98.6043	98.5752	98.5233	98.5043	98.5197	99.8007	99.9729	99.7905	99.7902	99.7742	98.633	98.6145	98.6491	98.7787	98.739	98.7413	98.7947	96.0545	96.0721	96.0763	96.0444	96.0683	96.0604	96.0628	96.067	96.0646	87.5475	96.1507	96.274	96.2709	96.2184	96.17	96.2311	96.2289	96.172	96.1635	96.1636	96.1336
X. citri subsp. fuscans 4834-R	NC_022541.1	80.0004	79.9347	89.9472	89.9981	99.7304	99.75	99.7452	100	98.6223	98.5216	98.6773	98.7071	98.4504	98.5637	98.5261	99.9114	99.8118	99.9905	99.9898	99.8369	98.6719	98.6511	98.7065	98.8043	98.7399	98.7536	98.7954	96.0133	95.9646	96.0521	96.0106	96.0077	96.0022	96.1102	96.1548	96.1459	87.5062	96.1629	96.2504	96.2588	96.1854	96.2249	96.2698	96.3068	96.195	96.1995	96.1995	96.1757
X. citri subsp. aurantifolii FDC1609	NZ_CP011163.1	80.0015	79.8959	89.8457	89.9992	98.541	98.5158	98.4992	98.6429	100	99.8167	99.0117	99.0132	98.4298	98.3955	98.5316	98.5726	98.5728	98.5892	98.6348	98.582	98.6742	98.5711	98.6301	98.5452	98.5672	98.5849	98.5395	96.0269	96.009	96.0099	96.0114	95.9945	96.0287	96.0507	96.0247	95.9841	87.5139	96.0869	96.0982	96.0998	96.0837	96.084	96.1375	96.1788	96.0893	96.0905	96.0938	96.1179
X. citri subsp. aurantifolii FDC1559	NZ_CP011160.1	79.9375	79.8788	89.919	90.0134	98.539	98.537	98.5118	98.5522	99.8045	100	99.046	99.0061	98.4485	98.4486	98.5132	98.5533	98.5276	98.5661	98.6025	98.588	98.633	98.5769	98.5746	98.5562	98.4603	98.4794	98.5213	95.9826	95.97	96.0269	96.0258	96.0237	95.9867	96.0162	96.0571	96.0092	87.5276	96.055	96.0728	96.0829	96.0605	96.0979	96.1487	96.1606	96.087	96.0888	96.0881	96.1574
X. citri subsp. aurantifolii FDC1566	NZ_CP012002.1	80.0234	80.0747	90.0381	90.055	98.5677	98.613	98.6131	98.73	99.041	99.0253	100	99.991	98.514	98.6753	98.7037	98.653	98.6297	98.7067	98.699	98.7138	98.7393	98.7399	98.6926	98.6602	98.6786	98.7122	98.6713	96.0069	96.0437	96.0145	95.9637	96.0523	96.0248	96.1468	96.1221	96.1324	87.6242	96.2771	96.3131	96.3341	96.2863	96.2737	96.3649	96.2674	96.1144	96.1151	96.114	96.1899
X. citri subsp. aurantifolii FDC1561	NZ_CP011250.1	79.9549	80.0578	89.9389	90.0593	98.5939	98.5951	98.5954	98.7787	99.0118	99.0562	99.9905	100	98.5822	98.6762	98.6836	98.6497	98.6304	98.7144	98.7406	98.7367	98.6818	98.7353	98.6803	98.7093	98.6557	98.7001	98.707	96.0086	96.0075	95.9961	95.9861	96.0421	96.0392	96.1627	96.1386	96.131	87.5926	96.2062	96.2562	96.2801	96.2882	96.2392	96.3315	96.3054	96.185	96.182	96.1819	96.193
X. citri subsp. vignicola CFBP7112	NZ_CP022267.1	79.9085	79.939	89.941	90.2299	98.5262	98.5002	98.4967	98.5791	98.5499	98.5485	98.6172	98.5775	100	98.6492	98.7703	98.4647	98.4861	98.6117	98.5511	98.5496	98.7747	98.7614	98.7746	98.729	98.706	98.7373	98.6784	96.1824	96.1583	96.1775	96.1797	96.1763	96.1995	96.1453	96.1874	96.2115	87.5168	96.1992	96.2315	96.2488	96.2343	96.2075	96.2318	96.2788	96.2247	96.2296	96.2287	96.2065
X. citri subsp. vignicola CFBP7111	NZ_CP022263.1	79.8743	79.8602	89.8958	90.0591	98.4775	98.4776	98.4795	98.6083	98.4537	98.4399	98.729	98.7195	98.6621	100	98.6586	98.485	98.5364	98.5314	98.5838	98.6347	98.7921	98.6461	98.7703	98.8024	98.7099	98.7628	98.7403	96.2556	96.2033	96.2297	96.205	96.2103	96.2143	96.1811	96.2276	96.1969	87.5699	96.2719	96.2272	96.2376	96.2463	96.3128	96.2215	96.3331	96.3362	96.3393	96.3392	96.3599
X. citri subsp. vignicola CFBP7113	NZ_CP022270.1	80.0518	80.0076	89.8945	90.1992	98.4726	98.4983	98.4795	98.6118	98.451	98.4663	98.6778	98.6827	98.7246	98.5641	100	98.4815	98.482	98.5785	98.5845	98.5581	98.7625	98.7125	98.7519	98.6091	98.7054	98.6769	98.6406	96.0645	96.1592	96.1089	96.1592	96.154	96.1911	96.1948	96.1879	96.2255	87.4744	96.2402	96.2201	96.2568	96.1614	96.2743	96.2444	96.2952	96.274	96.2881	96.2885	96.233
X. citri subsp. phaseoli var. fuscans CFBP6975	NZ_CP021006.1	79.9985	79.9952	89.8795	90.074	99.7618	99.7548	99.7556	99.9239	98.5711	98.5436	98.6702	98.6376	98.4792	98.413	98.4328	100	99.7964	99.9298	99.9415	99.8349	98.6483	98.5737	98.6307	98.7134	98.7062	98.7624	98.7552	96.0802	95.9885	96.0646	96.0326	96.0145	96.0672	96.0672	96.0994	96.0582	87.5583	96.0969	96.1344	96.1761	96.184	96.1681	96.161	96.2005	96.1365	96.1346	96.1342	96.0795
X. citri subsp. phaseoli var. fuscans CFBP6167	NZ_CP021018.1	79.9941	79.9579	89.9088	90.0635	99.9707	99.9706	99.9705	99.8053	98.6154	98.538	98.6173	98.6305	98.513	98.5295	98.4838	99.7773	100	99.7847	99.7974	99.7697	98.6431	98.6246	98.6449	98.7745	98.7187	98.8016	98.773	95.98	95.9588	95.9857	95.9794	96.0165	96.0164	96.0077	96.0386	96.0559	87.5882	96.1166	96.2312	96.2343	96.1436	96.1593	96.2143	96.217	96.1818	96.184	96.1827	96.115
X. citri subsp. phaseoli var. fuscans CFBP4885	NZ_CP020992.1	79.9817	79.9313	89.9329	90.0429	99.7434	99.7745	99.7681	99.9932	98.6433	98.5676	98.718	98.6973	98.4824	98.5586	98.5527	99.9281	99.8243	100	99.9881	99.8456	98.6914	98.6462	98.7401	98.7976	98.7818	98.7906	98.7886	96.0594	96.0491	96.0642	96.0544	96.0073	95.9961	96.0945	96.1454	96.1099	87.5294	96.1941	96.2487	96.2343	96.2053	96.2297	96.2874	96.2826	96.1699	96.1747	96.1756	96.1135
X. citri subsp. phaseoli var. fuscans CFBP6166	NZ_CP021001.1	79.9613	79.9154	89.9514	90.0924	99.7194	99.7418	99.7416	99.987	98.6075	98.59	98.7002	98.7405	98.5108	98.5573	98.5194	99.9284	99.8106	99.9926	100	99.8239	98.7168	98.6538	98.7507	98.7953	98.7436	98.7478	98.7684	96.0253	96.0302	96.055	96.0363	95.9813	95.9855	96.1113	96.1542	96.1057	87.5533	96.1734	96.2247	96.2076	96.1458	96.2804	96.2202	96.2795	96.1899	96.1903	96.1901	96.1535
X. citri subsp. phaseoli var. fuscans CFBP6165	NZ_CP020998.1	79.9732	79.9194	89.9427	90.1168	99.7512	99.7622	99.7692	99.8212	98.622	98.5731	98.7484	98.7705	98.5016	98.5349	98.5756	99.8245	99.7604	99.8308	99.8475	100	98.6525	98.6442	98.7081	98.8199	98.7906	98.814	98.8222	96.0185	96.0924	96.1016	96.0425	96.0104	96.0251	96.1332	96.1217	96.1748	87.6419	96.199	96.2871	96.2931	96.2252	96.2371	96.2784	96.3153	96.2313	96.2372	96.2352	96.1952
X. citri subsp. phaseoli var. fuscans CFBP6992	NZ_CP020985.1	79.8945	79.9424	90.0175	90.1546	98.6407	98.6649	98.6722	98.7136	98.6038	98.5552	98.7054	98.6981	98.7889	98.766	98.7348	98.7002	98.6844	98.7053	98.7727	98.719	100	99.9767	99.9685	98.8887	98.893	98.8522	98.865	96.1957	96.2372	96.2076	96.2151	96.2148	96.1858	96.1708	96.2201	96.1952	87.5719	96.2959	96.3297	96.3386	96.2778	96.2892	96.3041	96.3075	96.3522	96.3541	96.3533	96.3223
X. citri subsp. phaseoli var. fuscans CFBP6994R	NZ_CP020987.1	79.8933	79.9068	89.9449	90.1212	98.6842	98.6712	98.6711	98.6979	98.6031	98.539	98.7026	98.6691	98.8327	98.7343	98.7222	98.6529	98.646	98.6871	98.7253	98.7093	99.9676	100	99.9707	98.8451	98.8715	98.8125	98.834	96.1921	96.2251	96.197	96.2391	96.2038	96.2038	96.1463	96.2016	96.2026	87.5239	96.2461	96.2773	96.2839	96.2307	96.3392	96.2866	96.3155	96.2769	96.2782	96.2774	96.2392
X. citri subsp. phaseoli var. fuscans CFBP6996R	NZ_CP020989.1	79.907	79.9238	89.8219	90.0926	98.6988	98.7174	98.7202	98.7388	98.6339	98.6055	98.7189	98.6744	98.7758	98.8247	98.7091	98.6835	98.6951	98.7339	98.7644	98.7811	99.9603	99.9712	100	98.8862	98.8925	98.8749	98.8828	96.1879	96.1731	96.1747	96.267	96.1891	96.2009	96.1469	96.1956	96.2146	87.5468	96.3217	96.3373	96.3432	96.3013	96.3207	96.3109	96.2892	96.3032	96.3049	96.3043	96.3395
X. citri subsp. phaseoli var. fuscans CFBP6989	NZ_CP020981.1	79.8673	79.8796	89.8928	90.0705	98.8009	98.7992	98.7989	98.8289	98.5402	98.4292	98.6575	98.6865	98.7071	98.7564	98.6567	98.7759	98.8164	98.8569	98.8498	98.8713	98.899	98.8929	98.8747	100	99.9994	99.9813	99.9786	96.1324	96.1066	96.0794	96.1276	96.0847	96.1077	96.1594	96.1834	96.1902	87.5659	96.2473	96.2472	96.2361	96.1918	96.3204	96.2515	96.2431	96.3054	96.3114	96.3228	96.3148
X. citri subsp. phaseoli var. fuscans CFBP6988R	NZ_CP020979.1	79.9429	79.9449	89.8872	90.0792	98.8134	98.7882	98.7856	98.8554	98.5217	98.4549	98.6637	98.7042	98.6676	98.6971	98.6578	98.7514	98.7961	98.8382	98.8633	98.8553	98.8943	98.8547	98.8457	99.9994	100	99.9784	99.9759	96.1335	96.1351	96.1216	96.0938	96.1011	96.1056	96.1497	96.1464	96.1894	87.5959	96.2286	96.262	96.267	96.2286	96.2767	96.2639	96.2542	96.3865	96.3802	96.3794	96.3214
X. citri subsp. phaseoli var. fuscans CFBP6991	NZ_CP021015.1	79.935	79.9628	89.9263	90.1089	98.8015	98.8076	98.8225	98.8443	98.5347	98.4674	98.657	98.6794	98.6767	98.7203	98.6943	98.7778	98.8264	98.8278	98.8932	98.8913	98.8762	98.8206	98.88	99.9763	99.9795	100	99.9934	96.1658	96.112	96.163	96.1284	96.06	96.1192	96.2096	96.1912	96.1778	87.6229	96.216	96.2711	96.2847	96.2396	96.2447	96.2533	96.2505	96.3404	96.3414	96.3406	96.3166
X. citri subsp. phaseoli var. fuscans CFBP6990	NZ_CP020983.1	79.9187	79.9844	89.8882	90.1322	98.8157	98.8037	98.8137	98.8811	98.5203	98.4789	98.6936	98.6967	98.6576	98.6715	98.6649	98.7954	98.8309	98.8417	98.8953	98.9046	98.907	98.8466	98.8821	99.9773	99.9759	99.9947	100	96.1886	96.0905	96.1167	96.0915	96.1071	96.1065	96.2169	96.1626	96.1887	87.6362	96.2645	96.2544	96.2504	96.2099	96.2697	96.2386	96.2653	96.3875	96.3953	96.3942	96.3543
X. citri subsp. malvacearum HD-1	NZ_CP046019.1	79.8598	79.9167	89.8925	90.135	95.9458	95.9153	95.8994	96.0437	95.988	95.9709	96.0437	95.971	96.073	96.1068	96.203	96.0648	95.9171	96.0521	96.0592	95.9913	96.1169	96.1288	96.1958	96.1167	96.0826	96.1208	96.0828	100	99.9139	99.9219	99.9316	99.5161	99.5159	98.4734	98.4185	98.4826	87.6646	98.4645	98.5111	98.5074	98.5053	98.5292	98.5587	98.5343	98.4446	98.4447	98.445	98.3829
X. citri subsp. malvacearum XcmN1003	NZ_CP013006.1	79.8603	79.8267	89.7372	90.0674	95.9792	95.9665	95.9659	95.9796	96.0761	95.9862	96.1068	96.0451	96.0639	96.1324	96.1045	95.954	95.9261	95.9868	96.0676	96.0179	96.1493	96.0879	96.1468	96.099	96.0686	96.111	96.1104	99.911	100	99.9102	99.9276	99.5241	99.5341	98.4142	98.4389	98.4211	87.6679	98.4456	98.4004	98.379	98.4706	98.4642	98.4587	98.4491	98.3792	98.3821	98.3821	98.3459
X. citri subsp. malvacearum XcmH1005	NZ_CP013004.1	79.9143	79.8428	89.8284	90.1224	95.9467	95.9119	95.898	96.0515	96.0906	95.9779	96.0118	95.9989	96.1092	96.154	96.153	96.0082	95.9106	96.044	96.0478	95.9925	96.184	96.1456	96.2007	96.1443	96.1161	96.1549	96.1475	99.9053	99.9218	100	99.9328	99.5635	99.5208	98.4692	98.4329	98.4238	87.6224	98.4446	98.4598	98.4655	98.4772	98.4991	98.5134	98.5246	98.4545	98.4461	98.446	98.4164
X. citri subsp. malvacearum AR81009	NZ_CP023155.1	79.9482	79.8666	89.735	90.0776	96.0079	95.9652	95.965	96.0532	96.0481	95.9915	96.0255	95.972	96.1292	96.1706	96.1729	96.0376	95.9548	96.0651	96.0491	95.9904	96.1429	96.1475	96.2122	96.0712	96.1255	96.1754	96.0821	99.9284	99.9218	99.9426	100	99.5607	99.5155	98.4711	98.4455	98.4645	87.6141	98.4044	98.4532	98.4673	98.4978	98.4981	98.4741	98.551	98.4192	98.4196	98.4194	98.3761
X. citri subsp. malvacearum MSCT	NZ_CP017020.1	79.8851	79.8795	89.8433	90.0761	95.9831	95.9976	95.9815	96.0988	96.0262	95.9215	96.0752	96.0617	96.1002	96.1105	96.0827	96.0652	96.0033	96.1101	96.1285	96.0319	96.1549	96.0881	96.0745	96.0635	96.1084	96.1144	96.0677	99.5482	99.4826	99.5601	99.5445	100	99.9978	98.4621	98.4147	98.4189	87.6967	98.4355	98.4468	98.4548	98.4104	98.3948	98.4678	98.4336	98.4501	98.4509	98.451	98.4201
X. citri subsp. malvacearum MS14003	NZ_CP023159.1	79.9257	79.9291	89.8333	90.138	95.9789	95.9732	95.9673	96.0386	96.0232	95.9397	96.0401	96.0567	96.0777	96.0485	96.0974	96.0205	96.0098	96.0713	96.0815	96.0306	96.1293	96.119	96.1119	96.0938	96.112	96.0999	96.0701	99.5326	99.5223	99.5352	99.5418	99.9991	100	98.4217	98.4245	98.4085	87.6403	98.3821	98.4088	98.4172	98.4406	98.3816	98.4678	98.4284	98.3979	98.3929	98.3987	98.3755
X. citri subsp. punicae LMG7439	NZ_CP030164.1	79.9263	79.9399	89.7622	90.0545	96.0761	96.0744	96.0733	96.1282	96.0321	96.0034	96.0664	96.1115	96.099	96.1795	96.1842	96.1478	96.0594	96.1677	96.1384	96.1757	96.2132	96.1866	96.1928	96.2101	96.1689	96.2046	96.1835	98.4203	98.3474	98.4133	98.3826	98.389	98.4098	100	99.9831	99.9845	87.5898	98.5613	98.5051	98.5079	98.5223	98.5522	98.552	98.59	98.5711	98.5699	98.57	98.5428
X. citri subsp. punicae BD0025	NZ_CP030169.1	79.9655	79.9651	89.8216	90.0852	96.0856	96.0913	96.0778	96.1532	96.0632	96.0067	96.0671	96.1099	96.1586	96.1378	96.1887	96.136	96.124	96.1558	96.2045	96.1326	96.2003	96.1381	96.2293	96.1385	96.2305	96.209	96.1874	98.4214	98.4039	98.4048	98.4371	98.3938	98.4209	99.978	100	99.9923	87.601	98.5892	98.538	98.5201	98.5586	98.5566	98.5443	98.6126	98.546	98.5401	98.5466	98.5372
X. citri subsp. punicae BD0023	NZ_CP030161.1	79.9227	79.9938	89.8002	90.1071	96.0508	96.0226	96.0269	96.0801	96.0541	96.0381	96.0396	96.0957	96.0879	96.1667	96.1386	96.0871	96.0209	96.0987	96.1326	96.1348	96.2025	96.1976	96.2382	96.162	96.174	96.1862	96.1796	98.4671	98.3808	98.462	98.4176	98.4169	98.4031	99.9853	99.9923	100	87.6421	98.5319	98.5034	98.4865	98.4962	98.5525	98.51	98.511	98.52	98.5207	98.5207	98.4902
X. citri subsp. glycines 2098	NZ_CP041965.1	80.2654	80.3783	86.8044	87.0215	87.4812	87.431	87.4112	87.5185	87.4292	87.3634	87.5846	87.543	87.3793	87.5098	87.3968	87.5123	87.4958	87.5373	87.4441	87.4838	87.5352	87.5569	87.4848	87.5146	87.5084	87.5276	87.5152	87.6145	87.5313	87.511	87.5645	87.5888	87.5585	87.6189	87.5174	87.4944	100	87.4586	87.5838	87.6139	87.5362	87.5555	87.5364	87.5019	87.6336	87.6344	87.6242	87.6675
X. citri subsp. glycines 12-2	NZ_CP015972.1	79.8386	79.8715	89.8577	90.0993	96.1823	96.2274	96.2298	96.2276	96.1143	96.0967	96.2336	96.2472	96.1906	96.3056	96.3087	96.1488	96.2316	96.1972	96.2447	96.2104	96.3283	96.2065	96.2798	96.1845	96.2242	96.2121	96.1602	98.5331	98.3557	98.4297	98.518	98.4086	98.3662	98.6043	98.5549	98.5274	87.6245	100	99.9416	99.941	99.9022	99.978	99.9238	99.9678	98.6869	98.6897	98.6875	98.6952
X. citri subsp. glycines 8ra	NZ_CP017188.2	79.8656	79.8505	89.8929	90.2104	96.2694	96.2725	96.2573	96.2035	96.0742	96.0807	96.253	96.305	96.2227	96.2694	96.3168	96.1942	96.2386	96.1784	96.2395	96.1861	96.3356	96.24	96.2691	96.2229	96.2016	96.2167	96.1456	98.5292	98.408	98.4636	98.4652	98.434	98.4009	98.6018	98.5798	98.5367	87.5766	99.9261	100	99.9997	99.9146	99.9763	99.9796	99.9727	98.7457	98.7477	98.7431	98.7278
X. citri subsp. glycines 8ra	NZ_CP041781.1	79.8553	79.8619	89.9015	90.2142	96.272	96.289	96.271	96.2091	96.0668	96.0845	96.2644	96.3088	96.1979	96.2717	96.3012	96.1931	96.2387	96.18	96.2465	96.1702	96.3393	96.2509	96.2727	96.2294	96.1971	96.2205	96.1568	98.5278	98.4206	98.4581	98.491	98.4311	98.393	98.5985	98.5764	98.5212	87.5888	99.9261	99.9997	100	99.9146	99.9763	99.9796	99.9725	98.7535	98.7554	98.7522	98.7397
X. citri subsp. glycines EB08	NZ_CP026334.1	79.8712	79.8486	89.8835	90.1315	96.2342	96.2425	96.2399	96.2384	96.1555	96.1441	96.2469	96.2527	96.1971	96.2574	96.2593	96.1215	96.2124	96.2151	96.2445	96.192	96.3591	96.2441	96.2659	96.207	96.2062	96.2108	96.1828	98.5436	98.3701	98.4358	98.4792	98.3833	98.3847	98.6125	98.558	98.5471	87.6905	99.8952	99.9038	99.9037	100	99.9608	99.928	99.9206	98.7526	98.7531	98.751	98.7315
X. citri subsp. glycines K2	NZ_CP041967.1	79.8609	79.8489	89.9741	90.1674	96.2036	96.2254	96.2146	96.2439	96.1001	96.1893	96.3045	96.2493	96.1771	96.3015	96.3009	96.1466	96.2032	96.2344	96.2561	96.1969	96.2653	96.2325	96.2808	96.208	96.2399	96.2408	96.1855	98.5397	98.4296	98.4912	98.5244	98.347	98.3572	98.5751	98.5796	98.5541	87.6184	99.9712	99.9775	99.9775	99.9632	100	99.9412	99.9634	98.7581	98.7575	98.7579	98.6953
X. citri subsp. glycines 1157	NZ_CP041963.1	79.8204	79.7889	89.8529	90.1173	96.2011	96.1861	96.1844	96.2604	96.1198	96.0933	96.2777	96.2905	96.1684	96.258	96.2263	96.1633	96.212	96.2106	96.2575	96.2351	96.3132	96.2361	96.2564	96.2127	96.1992	96.2042	96.1681	98.5382	98.4718	98.4793	98.5745	98.3838	98.3926	98.5671	98.5499	98.5172	87.6361	99.9159	99.9636	99.9782	99.932	99.9541	100	99.9567	98.7625	98.7626	98.7628	98.7568
X. citri subsp. glycines 1018	NZ_CP041961.1	79.8924	79.8481	89.8949	90.1567	96.2187	96.2046	96.2175	96.2588	96.174	96.1628	96.2839	96.2568	96.1973	96.3233	96.2885	96.1722	96.2291	96.2258	96.2233	96.2092	96.344	96.2869	96.2952	96.222	96.2146	96.2482	96.2136	98.5578	98.4626	98.5099	98.5788	98.4118	98.4034	98.5786	98.6052	98.5452	87.6562	99.9628	99.9721	99.972	99.9424	99.9668	99.9762	100	98.8098	98.8055	98.8057	98.7639
X. citri subsp. citri AW15*	NZ_CP009037.1	79.9161	79.8992	89.9496	90.1617	96.1564	96.1518	96.1676	96.2522	96.1801	96.1792	96.1757	96.1797	96.2317	96.3765	96.2982	96.1445	96.1808	96.223	96.1807	96.1802	96.3501	96.2631	96.2902	96.2815	96.3142	96.3119	96.3411	98.4576	98.4589	98.4825	98.4631	98.5657	98.5435	98.5754	98.6153	98.6239	87.7485	98.7041	98.7631	98.7461	98.7591	98.7107	98.7642	98.7188	100	99.9984	99.999	99.9953
X. citri subsp. citri AW14*	NZ_CP009034.1	79.9252	79.9013	89.9518	90.1604	96.1556	96.1516	96.1673	96.2535	96.1813	96.1825	96.1777	96.1793	96.2317	96.3654	96.298	96.1448	96.1812	96.2222	96.1787	96.1804	96.3458	96.263	96.3004	96.2936	96.3092	96.3127	96.342	98.458	98.4435	98.4844	98.469	98.5657	98.5435	98.5764	98.6155	98.6249	87.7421	98.7039	98.7671	98.746	98.7624	98.7105	98.7637	98.718	99.9985	100	99.9986	99.9957
X. citri subsp. citri AW13*	NZ_CP009031.1	79.9252	79.9013	89.947	90.1621	96.156	96.1516	96.1674	96.2538	96.1817	96.1856	96.1779	96.1799	96.2371	96.3651	96.2981	96.1447	96.1813	96.2222	96.1806	96.1812	96.3456	96.2628	96.2989	96.2929	96.3079	96.323	96.3402	98.4582	98.4434	98.4844	98.4633	98.5657	98.5434	98.5755	98.6147	98.6243	87.745	98.7042	98.7632	98.7462	98.7664	98.7107	98.7641	98.723	99.999	99.9985	100	99.9957
X. citri subsp. citri AW12879*	NC_020815.1	79.8854	79.9141	89.9277	90.1628	96.1699	96.1549	96.1695	96.2538	96.1765	96.184	96.2064	96.2069	96.2405	96.351	96.2893	96.1694	96.1769	96.2483	96.1748	96.1825	96.3667	96.2962	96.2972	96.2846	96.2956	96.3318	96.324	98.4682	98.4463	98.5191	98.4639	98.5692	98.5234	98.5878	98.6165	98.6137	87.7451	98.7043	98.7776	98.76	98.7688	98.7053	98.7535	98.7113	99.9953	99.9956	99.9957	100
X. citri subsp. citri AW16*	NZ_CP009040.1	79.9264	79.8941	89.9373	90.1555	96.1415	96.1623	96.1853	96.2616	96.1705	96.182	96.186	96.1931	96.2326	96.3531	96.3045	96.1344	96.1784	96.237	96.1822	96.1937	96.3523	96.2647	96.2952	96.2905	96.3162	96.3313	96.3389	98.4537	98.4415	98.4809	98.4729	98.57	98.5423	98.5739	98.6241	98.6179	87.7364	98.7063	98.7536	98.7479	98.7564	98.7019	98.7595	98.7248	99.9983	99.9986	99.9988	99.9958
X. citri subsp. citri TX160197*	NZ_CP020889.1	79.8699	79.8758	89.9301	90.2162	96.0515	96.0985	96.0963	96.1414	96.1459	96.1133	96.0947	96.1465	96.2124	96.2517	96.3216	96.1435	96.1261	96.1791	96.1301	96.0975	96.319	96.2861	96.2731	96.2157	96.2353	96.2448	96.2629	98.4927	98.4774	98.5217	98.4651	98.4919	98.4645	98.5563	98.5881	98.5718	87.688	98.727	98.7187	98.7401	98.6802	98.6529	98.6947	98.7936	99.8663	99.8662	99.8665	99.8521
X. citri subsp. citri TX160042*	NZ_CP020882.1	79.9183	79.8258	89.9146	90.131	96.0796	96.0873	96.1151	96.1367	96.1646	96.1478	96.1388	96.1976	96.2011	96.3161	96.347	96.1262	96.1091	96.1082	96.1602	96.1536	96.2918	96.2947	96.2886	96.2324	96.2824	96.2672	96.2494	98.4444	98.4508	98.5287	98.4763	98.5144	98.5061	98.5892	98.5878	98.567	87.5894	98.662	98.6982	98.7232	98.7101	98.682	98.7183	98.7791	99.8563	99.8562	99.8564	99.8587
X. citri subsp. citri TX160149*	NZ_CP020885.1	79.8954	79.9661	89.9233	90.2329	96.1014	96.103	96.1272	96.1735	96.1233	96.1076	96.1733	96.1539	96.1581	96.2423	96.3261	96.1074	96.1272	96.189	96.1771	96.1942	96.2762	96.2975	96.2992	96.2347	96.2818	96.2803	96.2869	98.4332	98.4494	98.4991	98.4028	98.4378	98.4122	98.5384	98.5749	98.5594	87.6849	98.7041	98.7355	98.721	98.6994	98.685	98.7501	98.7613	99.7971	99.796	99.7965	99.8201
X. citri subsp. citri Xcc49*	NZ_CP023662.1	79.874	79.8261	89.9833	90.1137	96.0693	96.1044	96.1194	96.2207	96.1719	96.2472	96.1966	96.2041	96.2648	96.1965	96.3488	96.1665	96.1903	96.2592	96.2167	96.2533	96.2763	96.3206	96.3253	96.3166	96.3492	96.318	96.2999	98.452	98.42	98.4358	98.4267	98.4996	98.4889	98.6242	98.649	98.6444	87.6752	98.7523	98.7523	98.7563	98.7013	98.768	98.7544	98.7858	99.7413	99.7409	99.741	99.7342
X. citri subsp. citri UI6*	NZ_CP008992.1	79.9279	79.9444	89.998	90.1995	96.1143	96.1112	96.1291	96.1959	96.1717	96.2644	96.1956	96.1379	96.2235	96.2408	96.2976	96.1798	96.1998	96.2124	96.2402	96.2505	96.2508	96.322	96.2825	96.3147	96.3594	96.332	96.3051	98.4355	98.4139	98.4289	98.4548	98.4791	98.479	98.6383	98.6632	98.6647	87.6843	98.685	98.6748	98.6873	98.6287	98.7461	98.7855	98.8036	99.7155	99.7152	99.7153	99.7288
X. citri subsp. citri jx-6*	NZ_CP011827.2	79.8768	79.8022	90.0047	90.1469	96.0691	96.1134	96.1193	96.2268	96.1801	96.2298	96.1668	96.2013	96.2203	96.2039	96.313	96.1642	96.2158	96.2601	96.2293	96.2288	96.2785	96.3448	96.3119	96.3045	96.3502	96.3393	96.3209	98.4702	98.4258	98.4151	98.4459	98.5024	98.4679	98.6316	98.6744	98.6558	87.6513	98.7123	98.7494	98.7316	98.6751	98.7433	98.7479	98.7885	99.7339	99.734	99.7338	99.7196
X. citri subsp. citri UI7*	NZ_CP008989.1	79.8726	79.9145	89.9968	90.2139	96.1151	96.1207	96.1395	96.1927	96.1662	96.2402	96.1883	96.1281	96.2315	96.2376	96.3006	96.1817	96.197	96.2077	96.2438	96.247	96.255	96.3249	96.2765	96.3156	96.3638	96.3429	96.3317	98.4365	98.4181	98.4335	98.4541	98.4807	98.4752	98.6395	98.6501	98.6519	87.6806	98.6924	98.6741	98.694	98.6279	98.7506	98.7944	98.8014	99.7159	99.7155	99.7157	99.7283
X. citri subsp. citri LJ207-7*	NZ_CP018850.1	79.8811	79.8666	89.9391	90.1986	96.0819	96.0827	96.105	96.2029	96.1746	96.2224	96.1799	96.203	96.2172	96.2045	96.2718	96.1923	96.2139	96.2324	96.2463	96.2629	96.288	96.3437	96.3368	96.3411	96.35	96.3646	96.3122	98.4292	98.4577	98.4456	98.4232	98.5195	98.4946	98.6145	98.7135	98.6769	87.6845	98.716	98.6929	98.6704	98.6621	98.7641	98.7219	98.8218	99.7352	99.7353	99.7352	99.7478
X. citri subsp. citri LH201*	NZ_CP018858.1	79.8749	79.8048	89.9029	90.2031	96.0503	96.0601	96.0639	96.2158	96.2198	96.2542	96.2136	96.2162	96.2139	96.1793	96.3315	96.1264	96.201	96.2419	96.2396	96.2105	96.2922	96.3501	96.3466	96.2964	96.3227	96.3303	96.301	98.4301	98.4425	98.4721	98.4213	98.5135	98.4889	98.6218	98.6573	98.6614	87.6674	98.7292	98.703	98.7215	98.681	98.7617	98.7675	98.8455	99.7267	99.7264	99.7265	99.7385
X. citri subsp. citri FB19*	NZ_CP009022.1	79.9166	79.8793	90.0397	90.1572	96.0535	96.0679	96.074	96.2246	96.2323	96.2572	96.2057	96.2003	96.2231	96.2169	96.3138	96.1738	96.1759	96.2075	96.2197	96.2157	96.2484	96.3106	96.3147	96.3317	96.291	96.3179	96.3077	98.4574	98.4051	98.4255	98.4396	98.5256	98.457	98.6214	98.6373	98.6351	87.7088	98.6965	98.7337	98.7331	98.6473	98.7652	98.765	98.7709	99.743	99.7427	99.7428	99.7449
X. citri subsp. citri BL18*	NZ_CP009025.1	79.9111	79.8876	90.0326	90.1583	96.0564	96.0478	96.0527	96.2256	96.2355	96.2622	96.206	96.1946	96.2263	96.2191	96.3132	96.1739	96.1757	96.2075	96.2251	96.2158	96.2612	96.3185	96.3139	96.3323	96.2941	96.3148	96.3059	98.4668	98.4156	98.4238	98.437	98.5256	98.457	98.6226	98.6349	98.6353	87.7082	98.6932	98.7338	98.7274	98.6531	98.7636	98.7651	98.7712	99.7432	99.7429	99.7431	99.7451
X. citri subsp. citri 031638-1-1*	NZ_CP023285.1	79.8703	79.8463	89.995	90.1715	96.1116	96.126	96.1526	96.1892	96.2195	96.2463	96.2152	96.1868	96.243	96.1857	96.2832	96.1437	96.2362	96.2153	96.1973	96.1947	96.3008	96.3784	96.3271	96.3123	96.2992	96.3383	96.3333	98.4635	98.4397	98.4219	98.4596	98.5264	98.5002	98.6219	98.6656	98.6759	87.6674	98.7249	98.6873	98.6973	98.6675	98.7633	98.7742	98.7949	99.7423	99.7418	99.7423	99.7482
X. citri subsp. citri A306	NZ_CP006857.1	79.9006	79.8671	90.0347	90.1669	96.0537	96.0558	96.0617	96.2244	96.2375	96.2518	96.2063	96.1945	96.2308	96.2196	96.3131	96.1725	96.1758	96.2074	96.2238	96.2164	96.2606	96.3186	96.3234	96.3321	96.294	96.3145	96.3053	98.4665	98.4137	98.4226	98.4276	98.5256	98.457	98.6213	98.6346	98.635	87.7079	98.6896	98.7336	98.7273	98.653	98.767	98.765	98.7708	99.744	99.7438	99.7439	99.745
X. citri subsp. citri NT17*	NZ_CP008995.1	79.9196	79.8856	90.032	90.1518	96.0592	96.0592	96.0613	96.2241	96.2366	96.2634	96.2056	96.1945	96.2273	96.2195	96.3124	96.1732	96.1756	96.2131	96.2239	96.2134	96.2602	96.3162	96.3223	96.3296	96.2943	96.3144	96.3057	98.4666	98.4156	98.4232	98.4401	98.5231	98.457	98.6228	98.6365	98.6369	87.7076	98.705	98.7338	98.7274	98.653	98.7671	98.7649	98.7778	99.744	99.7437	99.7439	99.7451
X. citri subsp. citri 306*	NC_003919.1	79.9111	79.8794	90.0337	90.155	96.06	96.0598	96.0618	96.2241	96.2373	96.2628	96.2063	96.1948	96.2308	96.2198	96.3127	96.1736	96.1761	96.2083	96.2244	96.2138	96.2607	96.3164	96.3243	96.3301	96.2941	96.3145	96.3058	98.4666	98.4155	98.4222	98.4401	98.5256	98.457	98.6227	98.6346	98.6364	87.7086	98.7041	98.7337	98.7274	98.6531	98.767	98.7648	98.7701	99.7441	99.7439	99.744	99.7452
X. citri subsp. citri MF20*	NZ_CP009007.1	79.9111	79.8876	90.0317	90.1578	96.0537	96.0566	96.0664	96.2245	96.2354	96.2593	96.2058	96.1946	96.2308	96.219	96.3132	96.1724	96.1755	96.2072	96.2241	96.216	96.2605	96.3172	96.3184	96.33	96.2941	96.3146	96.3054	98.4665	98.4157	98.4237	98.4371	98.5257	98.4571	98.6226	98.6348	98.6352	87.7087	98.6964	98.7339	98.7275	98.6532	98.7674	98.7653	98.7713	99.7432	99.7429	99.7431	99.7451
X. citri subsp. citri 5028*	NZ_CP009028.1	79.9196	79.8876	90.0345	90.159	96.0602	96.0598	96.0619	96.2245	96.2375	96.263	96.206	96.1948	96.2312	96.2198	96.3133	96.1735	96.1758	96.2085	96.2244	96.216	96.2608	96.3173	96.316	96.3301	96.2942	96.3147	96.306	98.4668	98.4157	98.4233	98.4383	98.5258	98.4572	98.623	98.6351	98.6355	87.7084	98.6967	98.734	98.7276	98.6533	98.7674	98.7653	98.7711	99.7442	99.744	99.7441	99.7454
X. citri subsp. citri LL704-4*	NZ_CP018847.1	79.9346	79.8817	89.961	90.1186	96.0096	96.0536	96.0614	96.2196	96.2247	96.1992	96.2024	96.165	96.2586	96.1898	96.3229	96.1563	96.1541	96.1958	96.2014	96.2456	96.2999	96.3375	96.3277	96.3057	96.2981	96.3319	96.2894	98.4849	98.4596	98.4727	98.4687	98.5262	98.5288	98.6383	98.6791	98.6846	87.6399	98.753	98.7419	98.7579	98.7015	98.7771	98.7753	98.8187	99.7233	99.7234	99.7233	99.7082
X. citri subsp. citri GD3*	NZ_CP009016.1	79.8783	79.8964	89.9571	90.206	96.0477	96.0736	96.0919	96.2488	96.1927	96.2435	96.1859	96.1776	96.1983	96.2097	96.3245	96.2012	96.1975	96.2045	96.2255	96.3055	96.2763	96.3236	96.2917	96.3201	96.3311	96.3415	96.3203	98.4431	98.4412	98.4551	98.4439	98.502	98.4923	98.6686	98.65	98.6719	87.656	98.7279	98.7257	98.7162	98.673	98.7666	98.7592	98.812	99.7278	99.7276	99.7277	99.7458
X. citri subsp. citri LH276*	NZ_CP018854.1	79.8903	79.8633	89.9299	90.118	96.0225	96.0667	96.0766	96.2262	96.2047	96.1886	96.2126	96.1958	96.2261	96.1669	96.2889	96.1977	96.1977	96.1915	96.2109	96.2698	96.2705	96.3216	96.3253	96.2864	96.3357	96.3115	96.2943	98.4482	98.4994	98.4596	98.4482	98.4985	98.4712	98.6389	98.6669	98.6629	87.6432	98.7435	98.7225	98.7035	98.6948	98.7969	98.7807	98.8001	99.7309	99.7328	99.7327	99.7348
X. citri subsp. citri Xcc-29-1*	NZ_CP023661.1	79.8534	79.9108	89.9957	90.1649	96.0944	96.0853	96.1119	96.237	96.2382	96.2484	96.1879	96.2107	96.2401	96.2762	96.2997	96.1751	96.2199	96.2222	96.2086	96.2217	96.2792	96.3702	96.3256	96.3399	96.3294	96.3546	96.3292	98.4483	98.4374	98.4417	98.4519	98.5177	98.477	98.6186	98.6926	98.6625	87.743	98.7144	98.7044	98.6935	98.6641	98.7745	98.7741	98.7676	99.7391	99.7368	99.7369	99.739
X. citri subsp. citri GD2*	NZ_CP009019.1	79.8783	79.8964	89.9571	90.1918	96.049	96.0742	96.0925	96.2488	96.1926	96.2435	96.1861	96.1774	96.1983	96.2076	96.3242	96.1871	96.2017	96.2047	96.2251	96.3064	96.2765	96.3235	96.2917	96.3202	96.3311	96.3375	96.3202	98.4433	98.4412	98.4559	98.4417	98.4983	98.4922	98.6646	98.6489	98.6769	87.6603	98.7277	98.7254	98.7159	98.6728	98.7662	98.7621	98.8118	99.7278	99.7274	99.7276	99.7457
X. citri subsp. citri MN10*	NZ_CP009004.1	79.874	79.835	89.9996	90.1289	96.0829	96.0843	96.0909	96.2159	96.178	96.2328	96.166	96.196	96.2541	96.2119	96.3283	96.1603	96.2028	96.243	96.2116	96.2278	96.2819	96.331	96.3169	96.3169	96.3387	96.3424	96.2998	98.4916	98.4174	98.4452	98.4359	98.5401	98.5071	98.6462	98.6751	98.6801	87.6775	98.7189	98.752	98.7462	98.6725	98.7403	98.7508	98.7868	99.7407	99.7405	99.7406	99.7346
T4	CP059992	79.8065	79.8019	89.9777	90.1931	96.049	96.0939	96.1229	96.1962	96.2052	96.2455	96.2217	96.2326	96.206	96.2146	96.306	96.1542	96.1836	96.2011	96.2243	96.2509	96.2613	96.317	96.3078	96.2899	96.3175	96.3041	96.3162	98.4799	98.4979	98.461	98.4295	98.5033	98.4929	98.6138	98.6712	98.6362	87.7046	98.7078	98.6678	98.6735	98.651	98.7718	98.7366	98.7745	99.7394	99.7392	99.7392	99.7336
X. citri subsp. citri MN11*	NZ_CP009001.1	79.857	79.9043	89.9911	90.1766	96.1059	96.1143	96.1352	96.221	96.1849	96.2543	96.1626	96.1713	96.2561	96.2416	96.2786	96.1788	96.2105	96.2209	96.2271	96.2355	96.2806	96.3358	96.286	96.2712	96.3603	96.3201	96.3191	98.4534	98.446	98.4418	98.4358	98.4911	98.4995	98.6229	98.6761	98.6719	87.699	98.7033	98.6892	98.7073	98.6408	98.7459	98.7519	98.7802	99.7456	99.7455	99.7456	99.7415
X. citri subsp. citri MN12*	NZ_CP008998.1	79.8751	79.8275	89.997	90.1379	96.0837	96.0863	96.0927	96.2188	96.184	96.2326	96.1682	96.2066	96.2486	96.2124	96.3156	96.1609	96.1999	96.2557	96.2116	96.2401	96.2835	96.3316	96.3159	96.3165	96.3469	96.3447	96.3069	98.4915	98.4171	98.4471	98.4372	98.537	98.5039	98.6473	98.6781	98.6777	87.6702	98.7198	98.7529	98.7536	98.6729	98.7288	98.7521	98.7879	99.7423	99.742	99.7422	99.7361
X. citri subsp. citri JX5*	NZ_CP009010.1	79.8947	79.8277	90.0014	90.1325	96.0794	96.0959	96.0969	96.2168	96.168	96.2347	96.1734	96.2017	96.2351	96.2104	96.3148	96.1599	96.1938	96.2433	96.2083	96.2273	96.2817	96.3345	96.316	96.3146	96.3457	96.3426	96.3095	98.4864	98.4299	98.4478	98.4366	98.5345	98.5026	98.6422	98.6767	98.6718	87.6628	98.7184	98.7515	98.7522	98.6625	98.7261	98.7501	98.7887	99.7405	99.7403	99.7404	99.7343
X. citri subsp. citri JX4*	NZ_CP009013.1	79.8947	79.8323	90.0043	90.1299	96.08	96.1081	96.1111	96.2154	96.17	96.2298	96.1691	96.1986	96.2391	96.2086	96.3101	96.1608	96.1937	96.2541	96.2096	96.2356	96.2839	96.3332	96.3218	96.3131	96.3553	96.3361	96.3097	98.4861	98.4307	98.4481	98.4374	98.5204	98.5019	98.6438	98.6772	98.673	87.6716	98.7185	98.7543	98.7562	98.6711	98.7263	98.7511	98.7895	99.7408	99.7406	99.7407	99.7345
SN3-3	CP060002	79.9192	79.8627	89.9472	90.1724	96.0873	96.1271	96.144	96.1867	96.2471	96.2602	96.185	96.196	96.2322	96.1866	96.348	96.1504	96.1622	96.1874	96.2175	96.2327	96.2475	96.3773	96.3139	96.3501	96.3584	96.3514	96.3278	98.4392	98.3974	98.418	98.4423	98.5021	98.481	98.6289	98.6706	98.6789	87.645	98.7363	98.6931	98.7234	98.6968	98.7659	98.8128	98.7899	99.7093	99.709	99.7091	99.7258
B2	CP059999	79.8673	79.942	89.9537	90.1275	96.1065	96.0991	96.1245	96.2498	96.1974	96.2492	96.2112	96.1616	96.2236	96.2092	96.2695	96.2099	96.2393	96.2126	96.2292	96.2799	96.2603	96.3528	96.3083	96.2951	96.3768	96.3397	96.3096	98.4402	98.437	98.4164	98.4621	98.485	98.4904	98.6439	98.705	98.6597	87.7244	98.6745	98.7037	98.6885	98.6531	98.7527	98.7406	98.7988	99.739	99.7389	99.7376	99.7419
* strains used for ParSNP analysis
[truncated: 31 more columns]

## Sheet: Table S4
Supplementary Table 4. GO enrichment of strain specific genes
Strain	Catelog	GO ID	Description	Adjusted p value	GeneID
B2	Molecular Function	4803	transposase activity	0.0065221	B2003551|B2000165|B2000100|B2000168|B2003447
B2	Molecular Function	3676	nucleic acid binding	0.028829	B2001170|B2003471|B2000280|B2000171|B2003551|B2004011|B2003509|B2002969|B2001607|B2000827|B2000165|B2000100|B2002005|B2000376|B2000168|B2003169|B2002788|B2002810|B2002248|B2000632|B2003623
B2	Biological Process	32196	transposition	3.6827e-05	B2003471|B2000171|B2003551|B2000165|B2000100|B2000376|B2000168|B2000632|B2003447
B2	Biological Process	15074	DNA integration	3.6827e-05	B2003471|B2003509|B2000171|B2002969|B2001607|B2004011|B2000376|B2002788|B2002248|B2000632
B2	Biological Process	6259	DNA metabolic process	0.00021341	B2003471|B2000171|B2003551|B2004011|B2003509|B2002969|B2001607|B2000165|B2000100|B2000376|B2000168|B2002788|B2002810|B2002248|B2000632|B2003447
B2	Biological Process	6313	transposition, DNA-mediated	0.0044206	B2003551|B2000165|B2000100|B2000168|B2003447
B2	Biological Process	90304	nucleic acid metabolic process	0.019798	B2001170|B2003471|B2000171|B2003551|B2004011|B2003509|B2002969|B2001607|B2000165|B2000100|B2000376|B2000168|B2003169|B2002788|B2002810|B2002248|B2000632|B2003447
B2	Biological Process	6139	nucleobase-containing compound metabolic process	0.045371	B2001170|B2003471|B2000171|B2003551|B2004011|B2003509|B2002969|B2001607|B2000165|B2000286|B2000100|B2003751|B2004466|B2000376|B2000168|B2003169|B2002788|B2002810|B2002248|B2000632|B2003447
SN3-3	Molecular Function	4803	transposase activity	1.7162e-10	SN3-3_001981_1|SN3-3_004520_1|SN3-3_000552_1|SN3-3_003502_1|SN3-3_000533_1|SN3-3_002432_1|SN3-3_004725_1|SN3-3_004648_1|SN3-3_004729_1|SN3-3_002652_1|SN3-3_002877_1|SN3-3_004719_1
SN3-3	Molecular Function	140097	catalytic activity, acting on DNA	9.325e-06	SN3-3_001981_1|SN3-3_004520_1|SN3-3_003502_1|SN3-3_002432_1|SN3-3_004725_1|SN3-3_004729_1|SN3-3_002652_1|SN3-3_002877_1|SN3-3_004719_1|SN3-3_000560_1|SN3-3_000552_1|SN3-3_000533_1|SN3-3_001613_1|SN3-3_004648_1
SN3-3	Molecular Function	3676	nucleic acid binding	1.7217e-05	SN3-3_003527_1|SN3-3_003503_1|SN3-3_002661_1|SN3-3_002290_1|SN3-3_002432_1|SN3-3_004725_1|SN3-3_004729_1|SN3-3_002877_1|SN3-3_001228_1|SN3-3_000552_1|SN3-3_003557_1|SN3-3_000533_1|SN3-3_004648_1|SN3-3_001981_1|SN3-3_004520_1|SN3-3_003498_1|SN3-3_004332_1|SN3-3_000390_1|SN3-3_004719_1|SN3-3_002845_1|SN3-3_001195_1|SN3-3_000560_1|SN3-3_000375_1|SN3-3_000859_1|SN3-3_003609_1|SN3-3_000100_1|SN3-3_000…
SN3-3	Biological Process	32196	transposition	1.8594e-18	SN3-3_001981_1|SN3-3_003527_1|SN3-3_004520_1|SN3-3_003498_1|SN3-3_003502_1|SN3-3_002432_1|SN3-3_004725_1|SN3-3_004729_1|SN3-3_002652_1|SN3-3_002877_1|SN3-3_004719_1|SN3-3_001195_1|SN3-3_002288_1|SN3-3_001228_1|SN3-3_000375_1|SN3-3_003609_1|SN3-3_000100_1|SN3-3_000552_1|SN3-3_000533_1|SN3-3_004648_1|SN3-3_000169_1
SN3-3	Biological Process	6259	DNA metabolic process	1.4022e-14	SN3-3_003527_1|SN3-3_003503_1|SN3-3_002661_1|SN3-3_003502_1|SN3-3_002290_1|SN3-3_002432_1|SN3-3_004725_1|SN3-3_004729_1|SN3-3_002877_1|SN3-3_001228_1|SN3-3_000553_1|SN3-3_000552_1|SN3-3_003557_1|SN3-3_000533_1|SN3-3_004648_1|SN3-3_001981_1|SN3-3_004520_1|SN3-3_003498_1|SN3-3_002652_1|SN3-3_004719_1|SN3-3_002845_1|SN3-3_001195_1|SN3-3_002288_1|SN3-3_000375_1|SN3-3_003609_1|SN3-3_000100_1|SN3-3_001…
SN3-3	Biological Process	15074	DNA integration	8.3208e-12	SN3-3_003527_1|SN3-3_003503_1|SN3-3_003498_1|SN3-3_002661_1|SN3-3_002290_1|SN3-3_002845_1|SN3-3_001195_1|SN3-3_002288_1|SN3-3_001228_1|SN3-3_000375_1|SN3-3_003609_1|SN3-3_000100_1|SN3-3_003557_1|SN3-3_000524_1|SN3-3_000546_1|SN3-3_000169_1|SN3-3_001655_1
SN3-3	Biological Process	6313	transposition, DNA-mediated	7.584e-11	SN3-3_001981_1|SN3-3_004520_1|SN3-3_000552_1|SN3-3_003502_1|SN3-3_000533_1|SN3-3_002432_1|SN3-3_004725_1|SN3-3_004648_1|SN3-3_004729_1|SN3-3_002652_1|SN3-3_002877_1|SN3-3_004719_1
SN3-3	Biological Process	90304	nucleic acid metabolic process	7.0002e-09	SN3-3_003527_1|SN3-3_003503_1|SN3-3_002661_1|SN3-3_003502_1|SN3-3_002290_1|SN3-3_002432_1|SN3-3_004725_1|SN3-3_004729_1|SN3-3_002877_1|SN3-3_001228_1|SN3-3_000553_1|SN3-3_000552_1|SN3-3_003557_1|SN3-3_000533_1|SN3-3_004648_1|SN3-3_001981_1|SN3-3_004520_1|SN3-3_003498_1|SN3-3_002652_1|SN3-3_004719_1|SN3-3_002845_1|SN3-3_001195_1|SN3-3_002288_1|SN3-3_000375_1|SN3-3_000859_1|SN3-3_003609_1|SN3-3_000…
SN3-3	Biological Process	6310	DNA recombination	3.6562e-08	SN3-3_001981_1|SN3-3_004520_1|SN3-3_003503_1|SN3-3_003502_1|SN3-3_002432_1|SN3-3_004725_1|SN3-3_004729_1|SN3-3_002652_1|SN3-3_002877_1|SN3-3_004719_1|SN3-3_000552_1|SN3-3_000533_1|SN3-3_004648_1|SN3-3_000524_1
SN3-3	Biological Process	6139	nucleobase-containing compound metabolic process	3.8647e-06	SN3-3_003527_1|SN3-3_003503_1|SN3-3_002661_1|SN3-3_003502_1|SN3-3_002290_1|SN3-3_002432_1|SN3-3_004725_1|SN3-3_004729_1|SN3-3_002877_1|SN3-3_001228_1|SN3-3_000553_1|SN3-3_000552_1|SN3-3_003557_1|SN3-3_000533_1|SN3-3_004648_1|SN3-3_001981_1|SN3-3_004520_1|SN3-3_003498_1|SN3-3_000285_1|SN3-3_002652_1|SN3-3_004719_1|SN3-3_002845_1|SN3-3_001195_1|SN3-3_002288_1|SN3-3_000375_1|SN3-3_000859_1|SN3-3_003…
SN3-3	Biological Process	44260	cellular macromolecule metabolic process	3.3235e-05	SN3-3_003527_1|SN3-3_003503_1|SN3-3_002661_1|SN3-3_003502_1|SN3-3_002290_1|SN3-3_002432_1|SN3-3_004725_1|SN3-3_004729_1|SN3-3_002877_1|SN3-3_001228_1|SN3-3_000553_1|SN3-3_000552_1|SN3-3_003557_1|SN3-3_000533_1|SN3-3_004648_1|SN3-3_001222_1|SN3-3_001981_1|SN3-3_004520_1|SN3-3_003498_1|SN3-3_002652_1|SN3-3_004719_1|SN3-3_002845_1|SN3-3_001195_1|SN3-3_002288_1|SN3-3_000375_1|SN3-3_000859_1|SN3-3_003…
SN3-3	Biological Process	46483	heterocycle metabolic process	0.00011648	SN3-3_003527_1|SN3-3_003503_1|SN3-3_002661_1|SN3-3_003502_1|SN3-3_002290_1|SN3-3_002432_1|SN3-3_004725_1|SN3-3_004729_1|SN3-3_002877_1|SN3-3_001228_1|SN3-3_000553_1|SN3-3_000552_1|SN3-3_003557_1|SN3-3_000533_1|SN3-3_004648_1|SN3-3_001222_1|SN3-3_001981_1|SN3-3_004520_1|SN3-3_003498_1|SN3-3_000285_1|SN3-3_002652_1|SN3-3_004719_1|SN3-3_002845_1|SN3-3_001195_1|SN3-3_002288_1|SN3-3_000375_1|SN3-3_000…
SN3-3	Biological Process	6725	cellular aromatic compound metabolic process	0.00016499	SN3-3_003527_1|SN3-3_003503_1|SN3-3_002661_1|SN3-3_003502_1|SN3-3_002290_1|SN3-3_002432_1|SN3-3_004725_1|SN3-3_004729_1|SN3-3_002877_1|SN3-3_001228_1|SN3-3_000553_1|SN3-3_000552_1|SN3-3_003557_1|SN3-3_000533_1|SN3-3_004648_1|SN3-3_001981_1|SN3-3_004520_1|SN3-3_003498_1|SN3-3_000285_1|SN3-3_002652_1|SN3-3_004719_1|SN3-3_002845_1|SN3-3_001195_1|SN3-3_002288_1|SN3-3_000375_1|SN3-3_000859_1|SN3-3_003…
SN3-3	Biological Process	1901360	organic cyclic compound metabolic process	0.00016499	SN3-3_003527_1|SN3-3_003503_1|SN3-3_002661_1|SN3-3_003502_1|SN3-3_002290_1|SN3-3_002432_1|SN3-3_004725_1|SN3-3_004729_1|SN3-3_002877_1|SN3-3_001228_1|SN3-3_000553_1|SN3-3_000552_1|SN3-3_003557_1|SN3-3_000533_1|SN3-3_004648_1|SN3-3_001222_1|SN3-3_001981_1|SN3-3_004520_1|SN3-3_003498_1|SN3-3_000285_1|SN3-3_002652_1|SN3-3_004719_1|SN3-3_002845_1|SN3-3_001195_1|SN3-3_002288_1|SN3-3_000375_1|SN3-3_000…
SN3-3	Biological Process	43170	macromolecule metabolic process	0.00028272	SN3-3_003527_1|SN3-3_003503_1|SN3-3_002661_1|SN3-3_003502_1|SN3-3_002290_1|SN3-3_002432_1|SN3-3_004725_1|SN3-3_004729_1|SN3-3_002877_1|SN3-3_001150_1|SN3-3_001228_1|SN3-3_000553_1|SN3-3_000552_1|SN3-3_003084_1|SN3-3_003557_1|SN3-3_000533_1|SN3-3_004648_1|SN3-3_001222_1|SN3-3_001981_1|SN3-3_004520_1|SN3-3_003498_1|SN3-3_002652_1|SN3-3_004719_1|SN3-3_001333_1|SN3-3_002845_1|SN3-3_001195_1|SN3-3_002…
SN3-3	Biological Process	44238	primary metabolic process	0.0096586	SN3-3_001053_1|SN3-3_003527_1|SN3-3_002661_1|SN3-3_003502_1|SN3-3_002290_1|SN3-3_001228_1|SN3-3_000552_1|SN3-3_003557_1|SN3-3_000533_1|SN3-3_001222_1|SN3-3_004520_1|SN3-3_000285_1|SN3-3_001310_1|SN3-3_002652_1|SN3-3_004719_1|SN3-3_001333_1|SN3-3_002845_1|SN3-3_002288_1|SN3-3_001613_1|SN3-3_001409_1|SN3-3_000546_1|SN3-3_003338_1|SN3-3_001655_1|SN3-3_003810_1|SN3-3_002510_1|SN3-3_003503_1|SN3-3_002…
SN3-3	Biological Process	34641	cellular nitrogen compound metabolic process	0.0096586	SN3-3_003527_1|SN3-3_003503_1|SN3-3_002661_1|SN3-3_003502_1|SN3-3_002290_1|SN3-3_002432_1|SN3-3_004725_1|SN3-3_004729_1|SN3-3_002877_1|SN3-3_001228_1|SN3-3_000553_1|SN3-3_000552_1|SN3-3_003557_1|SN3-3_000533_1|SN3-3_004648_1|SN3-3_001981_1|SN3-3_004520_1|SN3-3_003498_1|SN3-3_000285_1|SN3-3_002652_1|SN3-3_004719_1|SN3-3_002845_1|SN3-3_001195_1|SN3-3_002288_1|SN3-3_000375_1|SN3-3_000859_1|SN3-3_003…
SN3-3	Biological Process	17000	antibiotic biosynthetic process	0.046942	SN3-3_001579_1|SN3-3_000042_1
T4	Molecular Function	3676	nucleic acid binding	0.00012967	T4001968|T4002816|T4000976|T4002418|T4002319|T4002819|T4004519|T4000376|T4001788|T4004236|T4003548|T4004413|T4004237|T4001787|T4002265|T4002166|T4001791|T4002264|T4001154|T4003133|T4002087|T4003131|T4003373|T4002628|T4003512|T4003137|T4004229|T4003136|T4003135|T4000100|T4004246|T4004226|T4000169|T4004227|T4002073|T4004232|T4004233|T4003122|T4003485|T4003067
T4	Molecular Function	3677	DNA binding	0.00045293	T4001968|T4000976|T4002418|T4002319|T4001788|T4004236|T4003548|T4004413|T4004237|T4002265|T4002166|T4001791|T4003133|T4002087|T4003131|T4002628|T4003137|T4004229|T4003136|T4003135|T4000100|T4004246|T4004226|T4004227|T4002073|T4004233|T4003485|T4003067
T4	Molecular Function	4803	transposase activity	0.037431	T4002073|T4002265|T4003484|T4002087|T4000100
T4	Molecular Function	5488	binding	0.039557	T4001968|T4002816|T4002418|T4002819|T4004519|T4004718|T4004679|T4004239|T4001684|T4000276|T4004236|T4003548|T4003349|T4004237|T4002578|T4002265|T4002264|T4003276|T4002263|T4004241|T4002628|T4003512|T4003599|T4003038|T4000960|T4000286|T4004246|T4003911|T4000169|T4002073|T4004058|T4000290|T4003122|T4003485|T4000976|T4002319|T4001708|T4000376|T4001268|T4001788|T4004413|T4004215|T4001787|T4004733|T40…
T4	Molecular Function	72341	modified amino acid binding	0.039557	T4002263|T4004215
T4	Molecular Function	31177	phosphopantetheine binding	0.039557	T4002263|T4004215
T4	Molecular Function	1901363	heterocyclic compound binding	0.039557	T4001968|T4002816|T4002418|T4002819|T4004519|T4004236|T4003548|T4003349|T4004237|T4002265|T4002264|T4004241|T4002628|T4003512|T4003599|T4004246|T4000169|T4002073|T4004058|T4000290|T4003122|T4003485|T4000976|T4002319|T4001708|T4000376|T4001788|T4004413|T4001787|T4002166|T4001791|T4001154|T4003133|T4002087|T4003131|T4003373|T4000902|T4003137|T4004229|T4003136|T4003135|T4000100|T4000023|T4004226|T40…
T4	Molecular Function	97159	organic cyclic compound binding	0.039557	T4001968|T4002816|T4002418|T4002819|T4004519|T4004236|T4003548|T4003349|T4004237|T4002265|T4002264|T4004241|T4002628|T4003512|T4003599|T4004246|T4000169|T4002073|T4004058|T4000290|T4003122|T4003485|T4000976|T4002319|T4001708|T4000376|T4001788|T4004413|T4001787|T4002166|T4001791|T4001154|T4003133|T4002087|T4003131|T4003373|T4000902|T4003137|T4004229|T4003136|T4003135|T4000100|T4000023|T4004226|T40…
T4	Biological Process	6259	DNA metabolic process	9.9404e-11	T4002816|T4002819|T4004519|T4001289|T4004239|T4000376|T4001788|T4004236|T4004413|T4001787|T4002265|T4001791|T4002264|T4001154|T4003133|T4002087|T4003131|T4002628|T4003512|T4003137|T4004229|T4003136|T4003135|T4000100|T4000169|T4004227|T4002073|T4004232|T4003122|T4003485|T4003484
T4	Biological Process	15074	DNA integration	4.5267e-10	T4002816|T4002819|T4004519|T4003512|T4000376|T4003137|T4004229|T4003136|T4003135|T4000169|T4004227|T4001787|T4004232|T4001791|T4002264|T4003122|T4003485|T4001154
T4	Biological Process	6310	DNA recombination	1.2807e-06	T4002628|T4004239|T4003137|T4004229|T4003136|T4003135|T4000100|T4004227|T4002073|T4002265|T4001791|T4003485|T4003484|T4002087
T4	Biological Process	90304	nucleic acid metabolic process	4.0894e-05	T4002816|T4002819|T4004519|T4001289|T4004239|T4000376|T4001788|T4004236|T4004413|T4001787|T4002265|T4001791|T4002264|T4001154|T4003133|T4002087|T4003131|T4002628|T4003512|T4003137|T4004229|T4003136|T4003135|T4000100|T4000169|T4004227|T4002073|T4004232|T4003122|T4003485|T4003484
T4	Biological Process	32196	transposition	9.647e-05	T4002073|T4002265|T4001154|T4003484|T4002087|T4003512|T4000376|T4000100|T4000169|T4001787
T4	Biological Process	44260	cellular macromolecule metabolic process	0.0016181	T4002816|T4002819|T4004519|T4001289|T4000794|T4004239|T4000376|T4001367|T4003344|T4001788|T4002976|T4004236|T4004413|T4001787|T4002265|T4003013|T4001791|T4002264|T4001154|T4003276|T4003133|T4002087|T4003131|T4002628|T4003512|T4003137|T4004229|T4003136|T4003135|T4000100|T4000169|T4003558|T4004227|T4002073|T4004232|T4003122|T4003485|T4003484|T4003181
T4	Biological Process	6139	nucleobase-containing compound metabolic process	0.0054631	T4002816|T4002819|T4004519|T4001289|T4004239|T4000376|T4001788|T4004236|T4004413|T4001787|T4002265|T4001791|T4002264|T4001154|T4003133|T4002087|T4003131|T4002628|T4003512|T4003137|T4004229|T4003136|T4000286|T4003135|T4000100|T4000169|T4004227|T4002073|T4004232|T4003122|T4003485|T4003484
T4	Biological Process	6313	transposition, DNA-mediated	0.016237	T4002073|T4002265|T4003484|T4002087|T4000100
T4	Biological Process	43170	macromolecule metabolic process	0.039593	T4002816|T4002819|T4004519|T4001289|T4000794|T4004239|T4000376|T4001367|T4003344|T4001788|T4002976|T4004236|T4004413|T4003822|T4001787|T4002265|T4003013|T4001791|T4002264|T4001154|T4003276|T4003133|T4002087|T4003131|T4002628|T4003512|T4003137|T4004229|T4003136|T4003135|T4000100|T4002987|T4000169|T4003558|T4004227|T4002073|T4004232|T4003122|T4003485|T4003484|T4003181
T4	Biological Process	6725	cellular aromatic compound metabolic process	0.040118	T4002816|T4002819|T4004519|T4001289|T4004239|T4000376|T4001788|T4004236|T4004413|T4001787|T4002265|T4001791|T4002264|T4001154|T4003133|T4002087|T4003131|T4002628|T4003512|T4003137|T4004229|T4003136|T4000286|T4003135|T4000100|T4000169|T4004227|T4002073|T4004232|T4004172|T4003122|T4003485|T4003484

## Sheet: Table S5
Supplementary Table 5. Gene clsters of the type II and type III secretion systems.
T2SS	Strain	Gsp cluster1
		C=N	D	E	F	G	H	I	J	K	L	M	cluster range	cluster range of 306
	B2	HZS92_00769	HZS92_00759	HZS92_00760	HZS92_00761	HZS92_00762	HZS92_00763	HZS92_00764	HZS92_00765	HZS92_00766	HZS92_00767	HZS92_00768	826759..836750	824637..834628
	SN3-3	HZS91_00811	HZS91_00801	HZS91_00802	HZS91_00803	HZS91_00804	HZS91_00805	HZS91_00806	HZS91_00807	HZS91_00808	HZS91_00809	HZS91_00810	878657..888648
	T4	HZS93_00769	HZS93_00759	HZS93_00760	HZS93_00761	HZS93_00762	HZS93_00763	HZS93_00764	HZS93_00765	HZS93_00766	HZS93_00767	HZS93_00768	824567..834559
	Strain	Gsp cluster2
		C=N	D	E	F	G	H	I	J	K	L	M	cluster range	cluster range of 306
	B2	HZS92_03770	HZS92_03769	HZS92_03780	HZS92_03778	HZS92_03777	HZS92_03776	HZS92_03775	HZS92_03774	HZS92_03773	HZS92_03772	HZS92_03771	4154076..4165125	4178555..4189592
	SN3-3	HZS91_03830	HZS91_03829	HZS91_03840	HZS91_03838	HZS91_03837	HZS91_03836	HZS91_03835	HZS91_03834	HZS91_03833	HZS91_03832	HZS91_03831	4225101..4236150
	T4	HZS93_03809	HZS93_03808	HZS93_03819	HZS93_03817	HZS93_03816	HZS93_03815	HZS93_03814	HZS93_03813	HZS93_03812	HZS93_03811	HZS93_03810	4200352..4211401
	Strain	Other Gsp genes
		F	O	cluster range	Gsp1 to GspO (bp)	GspO to Gsp2 (bp)	cluster range of 306
	B2	HZS92_03465	HZS92_03466	3795889..3798015	2961261	380540	3820403..3822529
	SN3-3	HZS91_03521	HZS91_03522	3865786..3867912	2977138	357189	2995766	Gsp1 to GspO (bp)
	T4	HZS93_03506	HZS93_03507	3842578..3844704	3018011	355648	356026	GspO to Gsp2 (bp)
T3SS	Strain	hpa
		F	B	A	P	1	2	cluster range	cluster range of 306
	B2	467467..465230	HZS92_00436	HZS92_00440	HZS92_00444	HZS92_00456	HZS92_00457	465227..490849	462712..488334
	SN3-3	464466..462529	HZS91_00435	HZS91_00439	HZS91_00443	HZS91_00455	HZS91_00456	462526..488148
	T4	464564..462627	HZS93_00435	HZS93_00439	HZS93_00443	HZS93_00455	HZS93_00456	462624..488246
	Strain	hrc
		S	R	Q	V	U	J	N	T	C
	B2	HZS92_00441	HZS92_00442	HZS92_00443	HZS92_00445	HZS92_00446	HZS92_00449	HZS92_00452	HZS92_00454	HZS92_00455
	SN3-3	HZS91_00440	HZS91_00441	HZS91_00442	HZS91_00444	HZS91_00445	HZS91_00448	HZS91_00451	HZS91_00453	HZS91_00454
	T4	HZS93_00440	HZS93_00441	HZS93_00442	HZS93_00444	HZS93_00445	HZS93_00448	HZS93_00451	HZS93_00453	HZS93_00454
	Strain	hrp
		F	E	D5	D6	B1	B2	B4	B5	B7
	B2	HZS92_00433	HZS92_00437	HZS92_00439	HZS92_00438	HZS92_00447	HZS92_00448	HZS92_00450	HZS92_00451	HZS92_00453
	SN3-3	HZS91_00432	HZS91_00436	HZS91_00438	HZS91_00437	HZS91_00446	HZS91_00447	HZS91_00449	HZS91_00450	HZS91_00452
	T4	HZS93_00432	HZS93_00436	HZS93_00438	HZS93_00437	HZS93_00446	HZS93_00447	HZS93_00449	HZS93_00450	HZS93_00452

## Sheet: Table S6
Supplementary Table 6. TALEs and repeat number of RVDs in plasmids.
Strain	Plasmid number	Plasmid name	Plasmid size							Plasmid accession
				Class III	unclassified		Class I		Class II
				pthA1	pthA2/1	pthA4/2	pthA2	pthA3	pthA4
Xc-A306b	2	pXAC33	33700	16.5			15.5			CP006855.1
		pXAC64	64920					15.5	17.5	CP006856.1
Xc-03-1638-1-1 b	2	pCuR*	249730							CP023286.1
		pP2	99153	21.5			15.5	15.5	17.5	CP023287.1
LJ207-7 b	3	pLJ207-7.1*	213743							CP018851.1
		pLJ207-7.2	94139	18.5				15.5	17.5	CP018852.1
		pLJ207-7.3	49382	21.5						CP018853.1
LM180 b	4	pLM180.1*	249697							CM007623.1
		pLM180.2	64978				13.5			CM007624.1
		pLM180.3	43340						17.5	CM007625.1
		pLM180.4	28949	6.5						CM007626.1
LM199 b	2	pLM199.1*	197085							CM007620.1
		pLM199.2	64935				15.5			CM007621.1
LH201 b	2	pLH201.1*	213737							CP018859.1
		pLH201.2	92707	21.5				15.5	17.5	CP018860.1
LH276 b	3	pLH276.1*	211337							CP018855.1
		pLH276.2	73024	21.5				15.5		CP018856.1
		pLH276.3	51192							CP018857.1
LL074-4 b	2	pLL074-4.1*	220688							CP018848.1
		pLL074-4.2	92708	21.5			15.5		17.5	CP018849.1
B2c	2	pB2_V1	137420	15.5x2	13.5			15.5	17.5	CP060000
		pB2_V3	94653	15.5	13.5				17.5	CP060001
SN3-3c	1	pSN3-3	63921	2.5		13.5		8.5		CP060003
T4c	2	pT4p1	99130	21.5			15.5	15.5	17.5	CP059993
		pT4p2*	312426							CP059994
*Copper resistance plasmid
aContains TALEs of Xc-A306, number indicate to repeat number
bAdapted from Gochez et al 2018.
cSequenced in this study

## Sheet: Table S7
Supplementary Table 7. Strains used for copper and arsenate resistance gene cluster alignment.
Organism name	Accession number	Contig	Reference
Xanthomonas citri subsp. citri 031638-1-1	NZ_CP023285.1	pCuR*	Gochez, A. M., et al. (2018)
X. citri subsp. citri DAR73889	NZ_CP060471.1	pXAS220	Webster, J., et al. (2020)
X. citri subsp. citri T4	CP059992	pT4p2	This study
X. citri subsp. citri LH201	NZ_CP018858.1	pLH201.1	Richard, D., et al. (2017)
X. citri subsp. citri LM180	NZ_CM007622.1	pLM180.1	Richard, D., et al. (2017)
X. citri subsp. citri LM199	NZ_CM007619.1	pLM199.1	Richard, D., et al. (2017)
X. euvesicatoria LMG930	NZ_CP018464.1	pLMG930.1	Richard, D., et al. (2017)
X. hortorum subsp. gardneri ICMP 7383	NZ_CP018732.1	pICMP7383.1	Richard, D., et al. (2017)
X. hortorum subsp. gardneri JS749-3	NZ_CP018729.1	pJS749-3.1	Richard, D., et al. (2017)
X. perforans LH3	NZ_CP018472.1	pLH3.1	Richard, D., et al. (2017)
X. vesicatoria LM159	NZ_CP018468.1	pLM159.1	Richard, D., et al. (2017)
Luteimonas sp. MC1825	NZ_CP061714.1	Chromosome	NA
Luteimonas sp. YGD11-2	NZ_CP035376.1	Chromosome	NA
Lysobacter enzymogenes M497-1	NZ_AP014940.1	Chromosome	Takami, H., et al. (2017)
Lysobacter sp. CW239	NZ_CP061847.1	Chromosome	NA
Pseudoxanthomonas sp. SSD1	CP059266.1	Chromosome	Krithika, A., et al. (2021)
P. mexicana GTZY	NZ_CP060028.1	Chromosome	Weng, L.-W., et al. (2021)
Stenotrophomonas sp. LM091	CP017483.1	Chromosome	Richard, D., et al. (2016)
S. maltophilia ICU331	NZ_CP040440.1	Chromosome	NA
S. maltophilia W18	NZ_CP028358.1	Chromosome	NA
Thermomonas sp. XSG	NZ_CP061497.1	Chromosome	Wu, X.-T., et al. (2021)
T. brevis KACC 16975	NZ_CP060711.1	Chromosome	NA
Gochez, A. M., et al. (2018). "Pacbio sequencing of copper-tolerant Xanthomonas citri reveals presence of a chimeric plasmid structure and provides insights into reassortment and shuffling of transcription activator-like effectors among X. citri strains." BMC genomics 19(1): 16.
Webster, J., et al. (2020). "Comparative Genomics of Xanthomonas citri pv. citri A* Pathotype Reveals Three Distinct Clades with Varying Plasmid Distribution." Microorganisms 8(12): 1947.
Richard, D., et al. (2017). "Adaptation of genetically monomorphic bacteria: evolution of copper resistance through multiple horizontal gene transfers of complex and versatile mobile genetic elements." Mol Ecol 26(7): 2131-2149.
Takami, H., et al. (2017). "Complete genome sequence and expression profile of the commercial lytic enzyme producer Lysobacter enzymogenes M497-1." DNA Research 24(2): 169-177.
Richard, D., et al. (2016). "Complete genome sequence of a copper-resistant bacterium from the citrus phyllosphere, Stenotrophomonas sp. strain LM091, obtained using long-read technology." Genome announcements 4(6).
Richard, D., et al. (2017). "Complete genome sequences of six copper-resistant Xanthomonas strains causing bacterial spot of solaneous plants, belonging to X. gardneri, X. euvesicatoria, and X. vesicatoria, using long-read technology." Genome announcements 5(8).
Krithika, A., et al. (2021). "Recovery of complete genomes and non-chromosomal replicons from activated sludge enrichment microbial communities with long read metagenome sequencing." NPJ Biofilms and Microbiomes 7(1).
Weng, L.-W., et al. (2021). "Complete genome sequence of Xylella taiwanensis and comparative analysis of virulence gene content with Xylella fastidiosa." Frontiers in microbiology 12: 1256.
Wu, X.-T., et al. (2021). "Genome Sequence of Sulfide-Dependent Denitrification Bacterium Thermomonas sp. Strain XSG, Isolated from Marine Sediment." Microbiology Resource Announcements 10(15).

## Sheet: Table S8
Supplementary Table 8. Strains containing the unique spacer repeat between the copper and arsenate resistance gene clusters.
Organism name	Accession number	Contig	Isolated host	Reference
Xanthomoas sp. gxlp16	CP062259.1	pXAC219	Citrus	NA
X. campestris subsp. vesicatoria str. 85-10	CP017191.1	p_XCV_1	Solanaceae	Seong, H. J., et al. (2016)
X. campestris subsp. Vesicatoria	AM039951.1	pXCV183	Solanaceae	Thieme, F., et al. (2005)
X. euvesicatoria LMG930*	NZ_CP018463.1	pLMG930.2	Solanaceae	Richard, D., et al. (2017)
X. hortorum subsp. gardneri ICMP 7383*	NZ_CP018732.1	pICMP7383.1	Solanaceae	Richard, D., et al. (2017)
X. perforans LH3*	NZ_CP018472.1	pLH3.1	Solanaceae	Richard, D., et al. (2017)
X. vesicatoria ATCC 35937 strain LMG911*	CP018726.1	pLMG911.1	Solanaceae	Richard, D., et al. (2017)
Thieme, F., et al. (2005). "Insights into genome plasticity and pathogenicity of the plant pathogenic bacterium Xanthomonas campestris pv. vesicatoria revealed by the complete genome sequence." Journal of bacteriology 187(21): 7254-7266.
Richard, D., et al. (2017). "Complete genome sequences of six copper-resistant Xanthomonas strains causing bacterial spot of solaneous plants, belonging to X. gardneri, X. euvesicatoria, and X. vesicatoria, using long-read technology." Genome announcements 5(8).
Seong, H. J., et al. (2016). "Methylome analysis of two Xanthomonas spp. using single-molecule real-time sequencing." The plant pathology journal 32(6): 500.

## Sheet: Table S9
Supplementary Table 9. Conjugation frequency of plasmid-borne copper resistance genes transferred between different Xanthomonas citri subsp. citri strains in vitro
Donor strain	Recipient strain	Conjugation frequency
T4	B2Rif a	3.2 x 10-7 to 3.2 x 10-5
	SN3-3Rif a	1.3 x 10-8 to 1.7 x 10-8
a Spontaneous rifampicin resistant mutants of strains B2 and SN3-3 were used as recipients.
